# Supplementary material
Source: Elsevier journal article supplement (https://www.natap.org/2024/HIV/mmc1.pdf)
Supplement: mmc1 [file mmc1.pdf]

# THE LANCET HIV

## Supplementary appendix

This appendix formed part of the original submission and has been peer reviewed. We post it as supplied by the authors.

Supplement to: Gupta SK, Berhe M, Crofoot G, et al. Lenacapavir administered every 26 weeks or daily in combination with oral daily antiretroviral therapy for initial treatment of HIV: a randomised, open-label, active-controlled, phase 2 trial. *Lancet HIV* 2023; **10**: e15–23.

## Supplementary Appendix

This appendix has been provided by the authors to give readers additional information about their work.

Supplement to: Gupta, et al. Lenacapavir Administered Every Six Months or Daily in Combination with Daily Oral Antiretroviral Therapy for Initial Treatment of HIV Infection: A Randomised, Open-Label, Active-Controlled, Phase 2 Trial

### Lenacapavir, a Novel Capsid Inhibitor in Multidrug-Resistant HIV Infection

#### Table of Contents

|                                  |                                                                                       |
|----------------------------------|---------------------------------------------------------------------------------------|
| List of Investigators            |                                                                                       |
| Inclusion and Exclusion Criteria |                                                                                       |
| Table S1.                        | Participants Who Discontinued Study Drug                                              |
| Table S2.                        | Virologic Response During Treatment (Missing = Failure)                               |
| Table S3.                        | Virologic Response at Week 54 (Snapshot)                                              |
| Table S4.                        | Details for Participants with Emergent Lenacapavir Resistance                         |
| Table S5.                        | Adverse Events in $\geq 5\%$ of Participants in Any Treatment Group                   |
| Table S6.                        | Lenacapavir-Related Injection Site Reactions                                          |
| Table S7.                        | Grade 3 to 4 Adverse Events                                                           |
| Table S8.                        | Serious Adverse Events                                                                |
| Table S9.                        | Grade 3 or 4 Laboratory Abnormalities in $\geq 3$ Participants in Any Treatment Group |
| Table S10.                       | Change from Baseline in Body Weight and Body Mass Index                               |
| Figure S1.                       | Antiviral Activity at Week 28                                                         |

## **GS-US-200-4334 Investigators**

### **United States**

Mezgebe Berhe  
Gordon E. Crofoot  
Moti N. Ramgopal  
Paul Benson  
Anita Scribner  
James Sims  
Cheryl McDonald  
Cynthia Brinson  
Peter J. Ruane  
William Sanchez  
Frederick A. Cruickshank  
Daniel R. Coulston  
Godson Oguchi  
Javier O. Morales-Ramirez  
Theo Hodge  
Craig Dietz  
Daniel S. Berger  
Edwin DeJesus  
Gary Ian Sinclair  
Anthony Mills  
Clifford A. Kinder  
Douglas Cunningham  
Paul Cook  
Princy Kumar  
Jeffrey L. Stephens  
Debbie Hagins  
Lizette Santiago  
Vilma Drelichman  
Michael Wohlfeiler  
Chiu-Bin Hsiao  
Deborah Goldstein  
Edward Gardner  
Richard Hengel  
Aditya Gaur  
Anson Kwame Wurapa  
Ann Khalsa  
Cheryl Newman  
Jorge L. Santana-Bagur  
Olayemi Osiyemi  
Samir K. Gupta

### **Dominican Republic**

Ellen Koenig

## **Inclusion and Exclusion Criteria**

***To be eligible for study participation, all of the following inclusion criteria had to be met:***

- 1) Willing and able to provide written informed consent prior to performing study procedures
- 2) Aged  $\geq 18$  years
- 3) Antiretroviral naïve with no use of any antiretroviral within one month of screening. Use of pre-exposure prophylaxis (any duration), post-exposure prophylaxis (any duration), or HIV-1 treatment ( $< 10$  days therapy total)  $> 1$  month prior to screening is permitted
- 4) Plasma HIV-1 RNA  $\geq 200$  copies/mL at screening
- 5) CD4+ cell count  $\geq 200$  cells/ $\mu$ L at screening
- 6) A negative serum pregnancy test is required for all women at screening
- 7) Participants of childbearing potential who engage in heterosexual intercourse must agree to use protocol-specified method(s) of contraception as defined in the protocol appendix.
- 8) Lactating women must agree to discontinue nursing before the study drug(s) is administered

***Individuals who meet any of the following exclusion criteria were not to be enrolled:***

- 1) An opportunistic illness requiring acute therapy within 30 days prior to screening
- 2) Active, serious infections (other than HIV-1 infection) requiring parenteral antibiotic or antifungal therapy within 30 days before screening
- 3) Active tuberculosis infection
- 4) Acute hepatitis within 30 days prior to screening
- 5) HBV infection, defined as screening results showing either or both of:
  - a. Positive HBV surface antigen
  - b. Positive HBV core antibody and negative HBV surface antibody
- 6) Hepatitis C virus (HCV) antibody positive and HCV RNA  $>$  lower limit of quantitation (LLOQ)
- 7) A history of or current clinical decompensated liver cirrhosis (eg, ascites, encephalopathy, or variceal bleeding)

- 8) Treatment within 3 months prior to screening, or anticipated treatment during the study period with immunosuppressant therapies, hydroxyurea, foscarnet, radiation, or cytotoxic chemotherapeutic agents without prior approval from sponsor prior to randomization. Agents disallowed in Table 5-5 of the protocol may not be considered for approval
- 9) Active malignancy requiring acute therapy (with the exception of local cutaneous Kaposi's sarcoma)
- 10) Current alcohol or substance use judged by the investigator to potentially interfere with the participant's study compliance
- 11) Clinically significant abnormal ECG at the screening visit
- 12) Any of the following laboratory values at screening
  - a. Estimated glomerular filtration rate (eGFR)  $\leq$  50 mL/min according to the Cockcroft-Gault formula for creatinine clearance
  - b. Alanine aminotransferase (ALT)  $>$  5 x upper limit of normal (ULN)
  - c. Direct bilirubin  $>$  1.5 x ULN
  - d. Platelets  $<$  50,000/mm<sup>3</sup>
  - e. Hemoglobin  $<$  8.0 g/dL
- 13) Participation or planned participation in any other clinical trial (including observational trials) without prior approval from the sponsor throughout the study
- 14) Prior use of, or exposure to, GS-6207
- 15) Known hypersensitivity to the study drug(s), the metabolites, or formulation excipient
- 16) Use or planned use of exclusionary medications, refer to Section 5.4 of the protocol
- 17) Any other clinical condition or prior therapy that, in the opinion of the investigator, would make the participant unsuitable for the study or unable to comply with dosing requirements

**Table S1. Participants Who Discontinued Study Drug**

| <b>Last Dose (Day)</b>                  | <b>Reason</b>                                                                                              |
|-----------------------------------------|------------------------------------------------------------------------------------------------------------|
| <b>SC lenacapavir +F/TAF→TAF (n=5)</b>  |                                                                                                            |
| 205                                     | Lack of efficacy (Did not meet the protocol criterion of having HIV-1 RNA <50 copies/mL prior to week 28)  |
| 183                                     | Lack of efficacy (Did not meet the protocol criterion of having HIV-1 RNA <50 copies/mL prior to week 28)  |
| 8                                       | Investigator's discretion (Due to COVID-19, complying with study procedures was not feasible)              |
| 71                                      | Lost to follow-up                                                                                          |
| 209                                     | Lost to follow-up                                                                                          |
| <b>SC lenacapavir +F/TAF→BIC (n=12)</b> |                                                                                                            |
| 156                                     | Adverse event (Grade 1, injection site induration at day 15)                                               |
| 211                                     | Adverse event (Grade 1, injection site induration at day 15)                                               |
| 399                                     | Adverse Event (Grade 1, injection site erythema and injection site swelling at day 196)                    |
| 153                                     | Lack of efficacy (did not meet the protocol criteria of having HIV-1 RNA <50 copies/mL prior to week 28)   |
| 1                                       | Participant decision (not able to comply with study procedures)                                            |
| 200                                     | Participant decision (withdrew consent)                                                                    |
| 376                                     | Participant decision (relocated for employment)                                                            |
| 396                                     | Participant decision (lives far from study site)                                                           |
| 113                                     | Investigator discretion (the participant's mental health was considered interfering with study procedures) |
| 450                                     | Investigator discretion (the participant not compliant with study drug)                                    |

---

|                                       |                                                        |
|---------------------------------------|--------------------------------------------------------|
| 273                                   | Lost to follow-up                                      |
| 388                                   | Lost to follow-up                                      |
| <b>Oral Lenacapavir + F/TAF (n=4)</b> |                                                        |
| 161                                   | Participant decision (started standard of care)        |
| 205                                   | Lost to follow-up                                      |
| 72                                    | Lost to follow-up                                      |
| 155                                   | Lost to follow-up                                      |
| <b>BIC/F/TAF (n=1)</b>                |                                                        |
| 267                                   | Participant decision (the participant's work schedule) |

---

**Table S2. Virologic Response During Treatment (Missing = Failure)**

| HIV-1 RNA <50 copies/mL – no. (%)<br>Difference in % (95% CI) | Lenacapavir                      |                                  |                                |                                  |                     |
|---------------------------------------------------------------|----------------------------------|----------------------------------|--------------------------------|----------------------------------|---------------------|
|                                                               | Subcutaneous                     |                                  | Oral                           | Total<br>(n=157)                 | BIC/F/TAF<br>(n=25) |
|                                                               | +F/TAF→TAF<br>(n=52)             | +F/TAF→BIC<br>(n=53)             | +F/TAF<br>(n=52)               |                                  |                     |
| Week                                                          |                                  |                                  |                                |                                  |                     |
| 4                                                             | 43 (83)<br>-6.6 (-20.9 to 7.8)   | 42 (79)<br>-4.2 (-20.1 to 11.7)  | 45 (87)<br>3.0 (-12.6 to 18.7) | 130 (83)<br>-1.9 (-15.4 to 11.6) | 21 (84)             |
| 10                                                            | 49 (94)<br>-6.3 (-17.1 to 4.4)   | 46 (87)<br>-13.0 (-25.1 to -1.0) | 50 (96)<br>-3.9 (-13.9 to 6.2) | 145 (92)<br>-7.8 (-16.6 to 1.0)  | 25 (100)            |
| 16                                                            | 48 (92)<br>-8.2 (-19.4 to 3.1)   | 50 (94)<br>-5.5 (-15.8 to 4.7)   | 49 (94)<br>-5.7 (-16.3 to 4.9) | 147 (94)<br>-6.5 (-15.2 to 2.1)  | 25 (100)            |
| 22                                                            | 47 (90)<br>-11.7 (-22.8 to -0.5) | 49 (93)<br>-7.4 (-18.3 to 3.4)   | 49 (94)<br>-5.8 (-16.5 to 4.8) | 145 (92)<br>-7.8 (-16.6 to 1.0)  | 25 (100)            |
| 28                                                            | 49 (94)<br>-5.5 (-15.9 to 4.8)   | 49 (93)<br>-7.4 (-18.3 to 3.4)   | 49 (94)<br>-5.7 (-16.3 to 4.9) | 147 (94)<br>-6.5 (-15.1 to 2.2)  | 25 (100)            |
| 38                                                            | 47 (90)<br>-6.7 (-20.7 to 7.3)   | 47 (89)<br>-7.2 (-21.3 to 6.8)   | 46 (89)<br>-7.6 (-21.8 to 6.7) | 140 (89)<br>-7.0 (-18.8 to 4.9)  | 24 (96)             |
| 54                                                            | 47 (90)<br>-2.6 (-18.4 to 13.2)  | 45 (85)<br>-7.1 (-23.4 to 9.3)   | 44 (85)<br>-7.2 (-23.5 to 9.1) | 136 (87)<br>-5.6 (-19.5 to 8.4)  | 23 (92)             |

BIC, bictegavir; F, emtricitabine; TAF, tenofovir alafenamide



**Table S3. Virologic Response at Week 54 (Snapshot)**

| Response Criteria                                                                        | Lenacapavir          |                      |                  |                  |                     |
|------------------------------------------------------------------------------------------|----------------------|----------------------|------------------|------------------|---------------------|
|                                                                                          | Subcutaneous         |                      | Oral             | Total<br>(n=157) | BIC/F/TAF<br>(n=25) |
|                                                                                          | +F/TAF→TAF<br>(n=52) | +F/TAF→BIC<br>(n=53) | +F/TAF<br>(n=52) |                  |                     |
| HIV-1 RNA <50 copies/mL — no. (%)                                                        | 47 (90)              | 45 (85)              | 44 (85)          | 136 (87)         | 23 (92)             |
| HIV-1 RNA ≥50 copies/mL — no. (%)                                                        | 2 (4)                | 2 (4)                | 3 (6)            | 7 (5)            | 0                   |
| HIV-1 RNA ≥50 copies/mL in week 54 window                                                | 0                    | 0                    | 3 (6)            | 3 (2)            | 0                   |
| Discontinued study drug due to lack of efficacy                                          | 2 (4)                | 1 (2)                | 0                | 3 (2)            | 0                   |
| Discontinued study drug due to other reasons* and last available HIV-1 RNA ≥50 copies/mL | 0                    | 1 (2)                | 0                | 1 (1)            | 0                   |
| No virologic data in week 54 window — no. (%)                                            | 3 (6)                | 6 (11)               | 5 (10)           | 14 (9)           | 2 (8)               |
| Discontinued study drug due to AE/death                                                  | 0                    | 2 (4)                | 0                | 2 (1)            | 0                   |
| Discontinued study drug due to other reasons* and last available HIV-1 RNA <50 copies/mL | 3 (6)                | 4 (8)                | 4 (8)            | 11 (7)           | 1 (4)               |
| Missing data during window but on study drug                                             | 0                    | 0                    | 1 (2)            | 1 (0.6)          | 1 (4)               |

AE, adverse event; BIC, bicitegravir; F, emtricitabine; TAF, tenofovir alafenamide

\*Other reasons include participants who discontinued study drug due to investigator’s discretion, participant decision, lost to follow-up, noncompliance with study drug, protocol violation, pregnancy, and study terminated by sponsor.

The week 54 window is between days 323 and 413 (inclusive).

**Table S4. Details for Participants with Emergent Lenacapavir Resistance**

| Participant | Group                | Baseline Viral Load (copies/mL) | VF Visit (copies/mL)† | Emergent Resistance Mutations* |         |      | Fold-Change‡ |      |      |     |
|-------------|----------------------|---------------------------------|-----------------------|--------------------------------|---------|------|--------------|------|------|-----|
|             |                      |                                 |                       | CA                             | RT      | IN   | LEN          | FTC  | TFV§ | BIC |
| 041         | SC LEN + (F/TAF→BIC) | 170000                          | Week 10 (96700)       | Q67H<br>K70R                   | M184M/I | None | 20           | >58  | 0.46 | ND  |
| 003         | Oral LEN + F/TAF     | 348000                          | Week 54 (64000)       | Q67H                           | None    | ND   | 7.1          | 0.85 | 0.75 | ND  |

BIC, bicitgravir; CA, capsid; F, FTC, emtricitabine; IN, integrase; LEN, lenacapavir; ND, not determined; RT, reverse transcriptase; TAF, tenofovir alafenamide; TFV, tenofovir; VF, virologic failure; WT, wild-type.

\*Compared with screening/baseline genotype.

‡Phenotypic fold change compared with WT control.

†A sample from the confirmatory virologic failure visit was used in the resistance analysis for Participant 003. Participant 041 was included in the resistance analysis due to persistent viremia.

§Phenotypic assay was performed with TFV, the parent compound of TAF.

**Table S5. Adverse Events in  $\geq 5\%$  of Participants in Any Treatment Group**

|                                                                     | SC LEN +<br>F/TAF→TAF<br>(n = 52) | SC LEN +<br>F/TAF→BIC<br>(n = 53) | Oral LEN +<br>F/TAF<br>(n = 52) | BIC/F/TAF<br>(n = 25) | SC LEN<br>Total<br>(n = 105) | LEN Total<br>(n = 157) |
|---------------------------------------------------------------------|-----------------------------------|-----------------------------------|---------------------------------|-----------------------|------------------------------|------------------------|
| Number (%) of participants with an adverse event                    | 50 (96.2%)                        | 45 (84.9%)                        | 43 (82.7%)                      | 21 (84.0%)            | 95 (90.5%)                   | 138 (87.9%)            |
| Adverse events in $\geq 5\%$ of participants in any treatment group |                                   |                                   |                                 |                       |                              |                        |
| Injection site erythema                                             | 21 (40.4%)                        | 12 (22.6%)                        | 0                               | 0                     | 33 (31.4%)                   | 33 (21.0%)             |
| Injection site swelling                                             | 16 (30.8%)                        | 13 (24.5%)                        | 0                               | 0                     | 29 (27.6%)                   | 29 (18.5%)             |
| Injection site pain                                                 | 15 (28.8%)                        | 10 (18.9%)                        | 0                               | 0                     | 25 (23.8%)                   | 25 (15.9%)             |
| Headache                                                            | 9 (17.3%)                         | 5 (9.4%)                          | 7 (13.5%)                       | 3 (12.0%)             | 14 (13.3%)                   | 21 (13.4%)             |
| Nausea                                                              | 10 (19.2%)                        | 5 (9.4%)                          | 6 (11.5%)                       | 1 (4.0%)              | 15 (14.3%)                   | 21 (13.4%)             |
| COVID-19                                                            | 5 (9.6%)                          | 5 (9.4%)                          | 5 (9.6%)                        | 3 (12.0%)             | 10 (9.5%)                    | 15 (9.6%)              |
| Syphilis                                                            | 5 (9.6%)                          | 4 (7.5%)                          | 5 (9.6%)                        | 4 (16.0%)             | 9 (8.6%)                     | 14 (8.9%)              |
| Injection site nodule                                               | 9 (17.3%)                         | 8 (15.1%)                         | 0                               | 0                     | 17 (16.2%)                   | 17 (10.8%)             |
| Lymphadenopathy                                                     | 4 (7.7%)                          | 4 (7.5%)                          | 6 (11.5%)                       | 1 (4.0%)              | 8 (7.6%)                     | 14 (8.9%)              |
| Injection site inflammation                                         | 10 (19.2%)                        | 4 (7.5%)                          | 0                               | 0                     | 14 (13.3%)                   | 14 (8.9%)              |
| Diarrhoea                                                           | 3 (5.8%)                          | 4 (7.5%)                          | 5 (9.6%)                        | 1 (4.0%)              | 7 (6.7%)                     | 12 (7.6%)              |
| Injection site induration                                           | 8 (15.4%)                         | 5 (9.4%)                          | 0                               | 0                     | 13 (12.4%)                   | 13 (8.3%)              |
| Arthralgia                                                          | 2 (3.8%)                          | 4 (7.5%)                          | 2 (3.8%)                        | 4 (16.0%)             | 6 (5.7%)                     | 8 (5.1%)               |
| Back pain                                                           | 1 (1.9%)                          | 4 (7.5%)                          | 4 (7.7%)                        | 3 (12.0%)             | 5 (4.8%)                     | 9 (5.7%)               |
| Depression                                                          | 1 (1.9%)                          | 6 (11.3%)                         | 3 (5.8%)                        | 1 (4.0%)              | 7 (6.7%)                     | 10 (6.4%)              |
| Influenza                                                           | 4 (7.7%)                          | 2 (3.8%)                          | 5 (9.6%)                        | 0                     | 6 (5.7%)                     | 11 (7.0%)              |
| Nasopharyngitis                                                     | 4 (7.7%)                          | 4 (7.5%)                          | 3 (5.8%)                        | 0                     | 8 (7.6%)                     | 11 (7.0%)              |
| Anxiety                                                             | 2 (3.8%)                          | 2 (3.8%)                          | 3 (5.8%)                        | 2 (8.0%)              | 4 (3.8%)                     | 7 (4.5%)               |
| Fatigue                                                             | 0                                 | 6 (11.3%)                         | 2 (3.8%)                        | 1 (4.0%)              | 6 (5.7%)                     | 8 (5.1%)               |
| Oropharyngeal pain                                                  | 2 (3.8%)                          | 4 (7.5%)                          | 3 (5.8%)                        | 0                     | 6 (5.7%)                     | 9 (5.7%)               |
| Pyrexia                                                             | 3 (5.8%)                          | 2 (3.8%)                          | 2 (3.8%)                        | 2 (8.0%)              | 5 (4.8%)                     | 7 (4.5%)               |
| Dizziness                                                           | 3 (5.8%)                          | 2 (3.8%)                          | 2 (3.8%)                        | 1 (4.0%)              | 5 (4.8%)                     | 7 (4.5%)               |
| Gonorrhoea                                                          | 2 (3.8%)                          | 2 (3.8%)                          | 3 (5.8%)                        | 1 (4.0%)              | 4 (3.8%)                     | 7 (4.5%)               |
| Hypertension                                                        | 3 (5.8%)                          | 3 (5.7%)                          | 1 (1.9%)                        | 1 (4.0%)              | 6 (5.7%)                     | 7 (4.5%)               |
| Vitamin D deficiency                                                | 0                                 | 4 (7.5%)                          | 3 (5.8%)                        | 1 (4.0%)              | 4 (3.8%)                     | 7 (4.5%)               |
| Vomiting                                                            | 3 (5.8%)                          | 1 (1.9%)                          | 4 (7.7%)                        | 0                     | 4 (3.8%)                     | 8 (5.1%)               |
| Weight increased                                                    | 2 (3.8%)                          | 1 (1.9%)                          | 2 (3.8%)                        | 3 (12.0%)             | 3 (2.9%)                     | 5 (3.2%)               |

|                                    |          |          |          |           |          |          |
|------------------------------------|----------|----------|----------|-----------|----------|----------|
| Abdominal pain                     | 4 (7.7%) | 1 (1.9%) | 1 (1.9%) | 1 (4.0%)  | 5 (4.8%) | 6 (3.8%) |
| Upper respiratory tract infection  | 2 (3.8%) | 0        | 2 (3.8%) | 3 (12.0%) | 2 (1.9%) | 4 (2.5%) |
| Urinary tract infection            | 1 (1.9%) | 1 (1.9%) | 4 (7.7%) | 1 (4.0%)  | 2 (1.9%) | 6 (3.8%) |
| Cough                              | 3 (5.8%) | 1 (1.9%) | 1 (1.9%) | 1 (4.0%)  | 4 (3.8%) | 5 (3.2%) |
| Insomnia                           | 1 (1.9%) | 0        | 2 (3.8%) | 3 (12.0%) | 1 (1.0%) | 3 (1.9%) |
| Onychomycosis                      | 3 (5.8%) | 1 (1.9%) | 2 (3.8%) | 0         | 4 (3.8%) | 6 (3.8%) |
| Oropharyngeal gonococcal infection | 1 (1.9%) | 1 (1.9%) | 3 (5.8%) | 1 (4.0%)  | 2 (1.9%) | 5 (3.2%) |
| Rash                               | 1 (1.9%) | 0        | 3 (5.8%) | 2 (8.0%)  | 1 (1.0%) | 4 (2.5%) |
| Acarodermatitis                    | 3 (5.8%) | 0        | 1 (1.9%) | 1 (4.0%)  | 3 (2.9%) | 4 (2.5%) |
| Anogenital warts                   | 0        | 1 (1.9%) | 3 (5.8%) | 1 (4.0%)  | 1 (1.0%) | 4 (2.5%) |
| Abdominal pain upper               | 2 (3.8%) | 0        | 0        | 2 (8.0%)  | 2 (1.9%) | 2 (1.3%) |
| Anal chlamydia infection           | 0        | 1 (1.9%) | 3 (5.8%) | 0         | 1 (1.0%) | 4 (2.5%) |
| Proctitis gonococcal               | 0        | 1 (1.9%) | 3 (5.8%) | 0         | 1 (1.0%) | 4 (2.5%) |
| Rhinitis allergic                  | 0        | 1 (1.9%) | 3 (5.8%) | 0         | 1 (1.0%) | 4 (2.5%) |
| Constipation                       | 0        | 0        | 3 (5.8%) | 0         | 0        | 3 (1.9%) |
| Hypertriglyceridaemia              | 0        | 3 (5.7%) | 0        | 0         | 3 (2.9%) | 3 (1.9%) |
| Otitis media                       | 0        | 0        | 1 (1.9%) | 2 (8.0%)  | 0        | 1 (0.6%) |
| Ligament sprain                    | 0        | 0        | 0        | 2 (8.0%)  | 0        | 0        |

BIC = bicitegravir; COVID-19 = coronavirus disease 2019; F = emtricitabine; LEN = lenacapavir; N = number of participants; SC = subcutaneous; TAF = tenofovir alafenamide

**Table S6. Lenacapavir-Related Injection Site Reactions**

|                                                                   | <b>SC LEN +<br/>F/TAF→TAF<br/>(n = 52)</b> | <b>SC LEN +<br/>F/TAF→BIC<br/>(n = 53)</b> | <b>SC LEN<br/>Total<br/>(n = 105)</b> |
|-------------------------------------------------------------------|--------------------------------------------|--------------------------------------------|---------------------------------------|
| Number of participants who received ≥1 SC injection               | 51                                         | 52                                         | 103                                   |
| Number (%) of participants                                        | 32 (62.7%)                                 | 25 (48.1%)                                 | 57 (55.3%)                            |
| Study drug-related ISRs by severity                               |                                            |                                            |                                       |
| Grade 1                                                           | 26 (51.0%)                                 | 23 (44.2%)                                 | 49 (47.6%)                            |
| Grade 2                                                           | 6 (11.8%)                                  | 1 (1.9%)                                   | 7 (6.8%)                              |
| Grade 3                                                           | 0                                          | 1 (1.9%)                                   | 1 (1.0%)                              |
| Grade 4                                                           | 0                                          | 0                                          | 0                                     |
| Grade 5                                                           | 0                                          | 0                                          | 0                                     |
| Injection site reaction                                           |                                            |                                            |                                       |
| Erythema                                                          | 18 (35.3%)                                 | 10 (19.2%)                                 | 28 (27.2%)                            |
| Swelling                                                          | 13 (25.5%)                                 | 11 (21.2%)                                 | 24 (23.3%)                            |
| Pain                                                              | 12 (23.5%)                                 | 8 (15.4%)                                  | 20 (19.4%)                            |
| Nodule                                                            | 8 (15.7%)                                  | 7 (13.5%)                                  | 15 (14.6%)                            |
| Inflammation                                                      | 10 (19.6%)                                 | 4 (7.7%)                                   | 14 (13.6%)                            |
| Induration                                                        | 8 (15.7%)                                  | 5 (9.6%)                                   | 13 (12.6%)                            |
| Mass                                                              | 2 (3.9%)                                   | 2 (3.8%)                                   | 4 (3.9%)                              |
| Bruising                                                          | 1 (2.0%)                                   | 0                                          | 1 (1.0%)                              |
| Haematoma                                                         | 0                                          | 1 (1.9%)                                   | 1 (1.0%)                              |
| Paraesthesia                                                      | 1 (2.0%)                                   | 0                                          | 1 (1.0%)                              |
| Pruritus                                                          | 0                                          | 1 (1.9%)                                   | 1 (1.0%)                              |
| Warmth                                                            | 1 (2.0%)                                   | 0                                          | 1 (1.0%)                              |
| Number of participants who received SC injection at day 15 visit  | 51                                         | 52                                         | 103                                   |
| Number (%) of participants                                        |                                            |                                            |                                       |
| Study drug-related ISRs following day 15 SC injection by severity | 22 (43.1%)                                 | 17 (32.7%)                                 | 39 (37.9%)                            |
| Grade 1                                                           | 18 (35.3%)                                 | 16 (30.8%)                                 | 34 (33.0%)                            |
| Grade 2                                                           | 4 (7.8%)                                   | 1 (1.9%)                                   | 5 (4.9%)                              |
| Grade 3                                                           | 0                                          | 0                                          | 0                                     |
| Grade 4                                                           | 0                                          | 0                                          | 0                                     |
| Grade 5                                                           | 0                                          | 0                                          | 0                                     |

|                                                                   |            |            |            |
|-------------------------------------------------------------------|------------|------------|------------|
| Injection site reaction following day 15 SC injection             |            |            |            |
| Pain                                                              | 9 (17.6%)  | 6 (11.5%)  | 15 (14.6%) |
| Erythema                                                          | 9 (17.6%)  | 5 (9.6%)   | 14 (13.6%) |
| Swelling                                                          | 7 (13.7%)  | 7 (13.5%)  | 14 (13.6%) |
| Nodule                                                            | 7 (13.7%)  | 4 (7.7%)   | 11 (10.7%) |
| Induration                                                        | 5 (9.8%)   | 4 (7.7%)   | 9 (8.7%)   |
| Mass                                                              | 2 (3.9%)   | 1 (1.9%)   | 3 (2.9%)   |
| Bruising                                                          | 1 (2.0%)   | 0          | 1 (1.0%)   |
| Paraesthesia                                                      | 1 (2.0%)   | 0          | 1 (1.0%)   |
| Warmth                                                            | 1 (2.0%)   | 0          | 1 (1.0%)   |
| Number of participants who received SC injection at week 28 visit | 48         | 47         | 95         |
| Number (%) of participants                                        | 24 (50.0%) | 18 (38.3%) | 42 (44.2%) |
| Study drug-related ISRs following week 28 SC injection            |            |            |            |
| Grade 1                                                           | 23 (47.9%) | 17 (36.2%) | 40 (42.1%) |
| Grade 2                                                           | 1 (2.1%)   | 0          | 1 (1.1%)   |
| Grade 3                                                           | 0          | 1 (2.1%)   | 1 (1.1%)   |
| Grade 4                                                           | 0          | 0          | 0          |
| Grade 5                                                           | 0          | 0          | 0          |
| Injection site reaction following week 28 SC injection            |            |            |            |
| Erythema                                                          | 11 (22.9%) | 6 (12.8%)  | 17 (17.9%) |
| Inflammation                                                      | 10 (20.8%) | 4 (8.5%)   | 14 (14.7%) |
| Swelling                                                          | 6 (12.5%)  | 5 (10.6%)  | 11 (11.6%) |
| Pain                                                              | 5 (10.4%)  | 4 (8.5%)   | 9 (9.5%)   |
| Nodule                                                            | 3 (6.3%)   | 5 (10.6%)  | 8 (8.4%)   |
| Induration                                                        | 6 (12.5%)  | 0          | 6 (6.3%)   |
| Haematoma                                                         | 0          | 1 (2.1%)   | 1 (1.1%)   |
| Mass                                                              | 0          | 1 (2.1%)   | 1 (1.1%)   |
| Number of participants who received SC injection at week 54 visit | 47         | 43         | 90         |
| Number (%) of participants                                        |            |            |            |
| Study drug-related ISRs following week 54 SC injection            | 12 (25.5%) | 11 (25.6%) | 23 (25.6%) |
| Grade 1                                                           | 11 (23.4%) | 11 (25.6%) | 22 (24.4%) |
| Grade 2                                                           | 1 (2.1%)   | 0          | 1 (1.1%)   |
| Grade 3                                                           | 0          | 0          | 0          |
| Grade 4                                                           | 0          | 0          | 0          |

|                                                        |           |           |            |
|--------------------------------------------------------|-----------|-----------|------------|
| Grade 5                                                | 0         | 0         | 0          |
| Injection site reaction following week 54 SC injection |           |           |            |
| Swelling                                               | 9 (19.1%) | 3 (7.0%)  | 12 (13.3%) |
| Nodule                                                 | 4 (8.5%)  | 5 (11.6%) | 9 (10.0%)  |
| Erythema                                               | 5 (10.6%) | 1 (2.3%)  | 6 (6.7%)   |
| Pain                                                   | 4 (8.5%)  | 2 (4.7%)  | 6 (6.7%)   |
| Induration                                             | 3 (6.4%)  | 1 (2.3%)  | 4 (4.4%)   |
| Mass                                                   | 0         | 1 (2.3%)  | 1 (1.1%)   |
| Pruritus                                               | 0         | 1 (2.3%)  | 1 (1.1%)   |

BIC = bicitegravir; F = emtricitabine; ISR = injection site reaction; LEN = lenacapavir; N = number of participants; SC = subcutaneous; TAF = tenofovir alafenamide

**Table S7. Grade 3 to 4 Adverse Events**

|                                                                 | <b>SC LEN +<br/>F/TAF→TAF<br/>(n = 52)</b> | <b>SC LEN +<br/>F/TAF→BIC<br/>(n = 53)</b> | <b>Oral LEN +<br/>F/TAF<br/>(n = 52)</b> | <b>B/F/TAF<br/>(n = 25)</b> | <b>SC LEN<br/>Total<br/>(n = 105)</b> | <b>LEN Total<br/>(n = 157)</b> |
|-----------------------------------------------------------------|--------------------------------------------|--------------------------------------------|------------------------------------------|-----------------------------|---------------------------------------|--------------------------------|
| Number (%) of participants with any Grade 3 or 4 adverse events | 2 (3.8%)                                   | 5 (9.4%)                                   | 6 (11.5%)                                | 2 (8.0%)                    | 7 (6.7%)                              | 13 (8.3%)                      |
| Grade 3 or 4 adverse events                                     |                                            |                                            |                                          |                             |                                       |                                |
| Anal fissure                                                    | 0                                          | 0                                          | 1 (1.9%)                                 | 0                           | 0                                     | 1 (0.6%)                       |
| Anogenital warts                                                | 0                                          | 0                                          | 0                                        | 1 (4.0%)                    | 0                                     | 0                              |
| Anxiety                                                         | 0                                          | 0                                          | 1 (1.9%)                                 | 0                           | 0                                     | 1 (0.6%)                       |
| Back pain                                                       | 0                                          | 0                                          | 1 (1.9%)                                 | 0                           | 0                                     | 1 (0.6%)                       |
| Bipolar disorder                                                | 0                                          | 0                                          | 1 (1.9%)                                 | 0                           | 0                                     | 1 (0.6%)                       |
| Deep vein thrombosis                                            | 0                                          | 1 (1.9%)                                   | 0                                        | 0                           | 1 (1.0%)                              | 1 (0.6%)                       |
| Dyspnoea                                                        | 1 (1.9%)                                   | 0                                          | 0                                        | 0                           | 1 (1.0%)                              | 1 (0.6%)                       |
| Hepatitis A                                                     | 0                                          | 1 (1.9%)                                   | 0                                        | 0                           | 1 (1.0%)                              | 1 (0.6%)                       |
| Hypertriglyceridaemia                                           | 0                                          | 1 (1.9%)                                   | 0                                        | 0                           | 1 (1.0%)                              | 1 (0.6%)                       |
| Injection site nodule                                           | 0                                          | 1 (1.9%)                                   | 0                                        | 0                           | 1 (1.0%)                              | 1 (0.6%)                       |
| Insomnia                                                        | 0                                          | 0                                          | 1 (1.9%)                                 | 0                           | 0                                     | 1 (0.6%)                       |
| Lymphadenopathy mediastinal                                     | 1 (1.9%)                                   | 0                                          | 0                                        | 0                           | 1 (1.0%)                              | 1 (0.6%)                       |
| Major depression                                                | 0                                          | 0                                          | 1 (1.9%)                                 | 0                           | 0                                     | 1 (0.6%)                       |
| Mental disorder                                                 | 0                                          | 0                                          | 1 (1.9%)                                 | 0                           | 0                                     | 1 (0.6%)                       |
| Metastases to central nervous system                            | 1 (1.9%)                                   | 0                                          | 0                                        | 0                           | 1 (1.0%)                              | 1 (0.6%)                       |
| Nephrolithiasis                                                 | 0                                          | 0                                          | 1 (1.9%)                                 | 0                           | 0                                     | 1 (0.6%)                       |
| Non-small cell lung cancer                                      | 1 (1.9%)                                   | 0                                          | 0                                        | 0                           | 1 (1.0%)                              | 1 (0.6%)                       |
| Pleural effusion                                                | 1 (1.9%)                                   | 0                                          | 0                                        | 0                           | 1 (1.0%)                              | 1 (0.6%)                       |
| Pneumocystis jirovecii pneumonia                                | 0                                          | 0                                          | 1 (1.9%)                                 | 0                           | 0                                     | 1 (0.6%)                       |
| Pneumonia                                                       | 1 (1.9%)                                   | 0                                          | 0                                        | 0                           | 1 (1.0%)                              | 1 (0.6%)                       |
| Pneumothorax                                                    | 0                                          | 0                                          | 1 (1.9%)                                 | 0                           | 0                                     | 1 (0.6%)                       |
| Poisoning                                                       | 0                                          | 0                                          | 1 (1.9%)                                 | 0                           | 0                                     | 1 (0.6%)                       |
| Psychotic disorder                                              | 0                                          | 0                                          | 1 (1.9%)                                 | 0                           | 0                                     | 1 (0.6%)                       |
| Substance-induced psychotic disorder                            | 0                                          | 1 (1.9%)                                   | 0                                        | 0                           | 1 (1.0%)                              | 1 (0.6%)                       |
| Syncope                                                         | 0                                          | 1 (1.9%)                                   | 0                                        | 0                           | 1 (1.0%)                              | 1 (0.6%)                       |
| Transient ischaemic attack                                      | 0                                          | 0                                          | 0                                        | 1 (4.0%)                    | 0                                     | 0                              |



|                   |          |   |   |   |          |          |
|-------------------|----------|---|---|---|----------|----------|
| Uterine leiomyoma | 1 (1.9%) | 0 | 0 | 0 | 1 (1.0%) | 1 (0.6%) |
| Vomiting          | 1 (1.9%) | 0 | 0 | 0 | 1 (1.0%) | 1 (0.6%) |

BIC = bictegravir; F = emtricitabine; LEN = lenacapavir; N = number of participants; SC = subcutaneous; TAF = tenofovir alafenamide

**Table S8. Serious Adverse Events**

| <b>System Organ Class<br/>Event, No. (%)</b>                             | <b>SC LEN +<br/>F/TAF→TAF<br/>(n = 52)</b> | <b>SC LEN +<br/>F/TAF→BIC<br/>(n = 53)</b> | <b>Oral LEN<br/>+ F/TAF<br/>(n = 52)</b> | <b>BIC/F/TAF<br/>(n = 25)</b> | <b>SC LEN Total<br/>(n = 105)</b> | <b>LEN Total<br/>(n = 157)</b> |
|--------------------------------------------------------------------------|--------------------------------------------|--------------------------------------------|------------------------------------------|-------------------------------|-----------------------------------|--------------------------------|
| Number (%) of participants with any serious adverse events               | 3 (5.8%)                                   | 3 (5.7%)                                   | 4 (7.7%)                                 | 0                             | 6 (5.7%)                          | 10 (6.4%)                      |
| Blood and lymphatic system disorders                                     | 1 (1.9%)                                   | 0                                          | 0                                        | 0                             | 1 (1.0%)                          | 1 (0.6%)                       |
| Lymphadenopathy mediastinal                                              | 1 (1.9%)                                   | 0                                          | 0                                        | 0                             | 1 (1.0%)                          | 1 (0.6%)                       |
| Gastrointestinal disorders                                               | 1 (1.9%)                                   | 0                                          | 0                                        | 0                             | 1 (1.0%)                          | 1 (0.6%)                       |
| Vomiting                                                                 | 1 (1.9%)                                   | 0                                          | 0                                        | 0                             | 1 (1.0%)                          | 1 (0.6%)                       |
| Infections and infestations                                              | 2 (3.8%)                                   | 3 (5.7%)                                   | 1 (1.9%)                                 | 0                             | 5 (4.8%)                          | 6 (3.8%)                       |
| Escherichia infection                                                    | 0                                          | 1 (1.9%)                                   | 0                                        | 0                             | 1 (1.0%)                          | 1 (0.6%)                       |
| Hepatitis A                                                              | 0                                          | 1 (1.9%)                                   | 0                                        | 0                             | 1 (1.0%)                          | 1 (0.6%)                       |
| Perirectal abscess                                                       | 0                                          | 1 (1.9%)                                   | 0                                        | 0                             | 1 (1.0%)                          | 1 (0.6%)                       |
| Pneumocystis jirovecii pneumonia                                         | 0                                          | 0                                          | 1 (1.9%)                                 | 0                             | 0                                 | 1 (0.6%)                       |
| Pneumonia                                                                | 1 (1.9%)                                   | 0                                          | 0                                        | 0                             | 1 (1.0%)                          | 1 (0.6%)                       |
| Staphylococcal infection                                                 | 1 (1.9%)                                   | 0                                          | 0                                        | 0                             | 1 (1.0%)                          | 1 (0.6%)                       |
| Injury, poisoning and procedural complications                           | 0                                          | 0                                          | 1 (1.9%)                                 | 0                             | 0                                 | 1 (0.6%)                       |
| Poisoning                                                                | 0                                          | 0                                          | 1 (1.9%)                                 | 0                             | 0                                 | 1 (0.6%)                       |
| Neoplasms benign, malignant and unspecified (including cysts and polyps) | 2 (3.8%)                                   | 0                                          | 0                                        | 0                             | 2 (1.9%)                          | 2 (1.3%)                       |
| Metastases to central nervous system                                     | 1 (1.9%)                                   | 0                                          | 0                                        | 0                             | 1 (1.0%)                          | 1 (0.6%)                       |
| Non-small cell lung cancer                                               | 1 (1.9%)                                   | 0                                          | 0                                        | 0                             | 1 (1.0%)                          | 1 (0.6%)                       |
| Uterine leiomyoma                                                        | 1 (1.9%)                                   | 0                                          | 0                                        | 0                             | 1 (1.0%)                          | 1 (0.6%)                       |
| Psychiatric disorders                                                    | 0                                          | 1 (1.9%)                                   | 2 (3.8%)                                 | 0                             | 1 (1.0%)                          | 3 (1.9%)                       |
| Bipolar disorder                                                         | 0                                          | 0                                          | 1 (1.9%)                                 | 0                             | 0                                 | 1 (0.6%)                       |
| Major depression                                                         | 0                                          | 0                                          | 1 (1.9%)                                 | 0                             | 0                                 | 1 (0.6%)                       |
| Mental disorder                                                          | 0                                          | 0                                          | 1 (1.9%)                                 | 0                             | 0                                 | 1 (0.6%)                       |
| Psychotic disorder                                                       | 0                                          | 0                                          | 1 (1.9%)                                 | 0                             | 0                                 | 1 (0.6%)                       |
| Substance-induced psychotic disorder                                     | 0                                          | 1 (1.9%)                                   | 0                                        | 0                             | 1 (1.0%)                          | 1 (0.6%)                       |
| Respiratory, thoracic and mediastinal disorders                          | 1 (1.9%)                                   | 0                                          | 1 (1.9%)                                 | 0                             | 1 (1.0%)                          | 2 (1.3%)                       |
| Dyspnoea                                                                 | 1 (1.9%)                                   | 0                                          | 0                                        | 0                             | 1 (1.0%)                          | 1 (0.6%)                       |
| Pleural effusion                                                         | 1 (1.9%)                                   | 0                                          | 0                                        | 0                             | 1 (1.0%)                          | 1 (0.6%)                       |

|              |   |   |          |   |   |          |
|--------------|---|---|----------|---|---|----------|
| Pneumothorax | 0 | 0 | 1 (1.9%) | 0 | 0 | 1 (0.6%) |
|--------------|---|---|----------|---|---|----------|

BIC = bictegravir; F = emtricitabine; LEN = lenacapavir; N = number of participants; SC = subcutaneous; TAF = tenofovir alafenamide

**Table S9. Grade 3 or 4 Treatment-Emergent Laboratory Abnormalities for ≥3 Participants in Any Treatment Group**

| <b>Maximum Postbaseline Toxicity Grade, No. (%)</b> | <b>SC LEN + F/TAF→TAF (n = 52)</b> | <b>SC LEN + F/TAF→BIC (n = 53)</b> | <b>Oral LEN + F/TAF (n = 52)</b> | <b>BIC/F/TAF (n = 25)</b> | <b>SC LEN Total (n = 105)</b> | <b>LEN Total (n = 157)</b> |
|-----------------------------------------------------|------------------------------------|------------------------------------|----------------------------------|---------------------------|-------------------------------|----------------------------|
| Participants with postbaseline value                | 52                                 | 53                                 | 52                               | 25                        | 105                           | 157                        |
| Grade 3 or 4                                        | 11 (21.2%)                         | 15 (28.3%)                         | 13 (25.0%)                       | 6 (24.0%)                 | 26 (24.8%)                    | 39 (24.8%)                 |
| Grade 3                                             | 6 (11.5%)                          | 11 (20.8%)                         | 9 (17.3%)                        | 6 (24.0%)                 | 17 (16.2%)                    | 26 (16.6%)                 |
| Grade 4                                             | 5 (9.6%)                           | 4 (7.5%)                           | 4 (7.7%)                         | 0                         | 9 (8.6%)                      | 13 (8.3%)                  |
| <b>Hematology</b>                                   |                                    |                                    |                                  |                           |                               |                            |
| Absolute neutrophil count, low                      | 52                                 | 53                                 | 52                               | 25                        | 105                           | 157                        |
| Grade 3 or 4                                        | 2 (3.8%)                           | 0                                  | 0                                | 0                         | 2 (1.9%)                      | 2 (1.3%)                   |
| Grade 3                                             | 2 (3.8%)                           | 0                                  | 0                                | 0                         | 2 (1.9%)                      | 2 (1.3%)                   |
| <b>Chemistry</b>                                    |                                    |                                    |                                  |                           |                               |                            |
| ALT (SGPT), high                                    | 52                                 | 53                                 | 52                               | 25                        | 105                           | 157                        |
| Grade 3 or 4                                        | 0                                  | 2 (3.8%)                           | 3 (5.8%)                         | 0                         | 2 (1.9%)                      | 5 (3.2%)                   |
| Grade 3                                             | 0                                  | 1 (1.9%)                           | 1 (1.9%)                         | 0                         | 1 (1.0%)                      | 2 (1.3%)                   |
| Grade 4                                             | 0                                  | 1 (1.9%)                           | 2 (3.8%)                         | 0                         | 1 (1.0%)                      | 3 (1.9%)                   |
| AST (SGOT), high                                    | 52                                 | 53                                 | 52                               | 25                        | 105                           | 157                        |
| Grade 3 or 4                                        | 2 (3.8%)                           | 2 (3.8%)                           | 3 (5.8%)                         | 0                         | 4 (3.8%)                      | 7 (4.5%)                   |
| Grade 3                                             | 2 (3.8%)                           | 1 (1.9%)                           | 3 (5.8%)                         | 0                         | 3 (2.9%)                      | 6 (3.8%)                   |
| Grade 4                                             | 0                                  | 1 (1.9%)                           | 0                                | 0                         | 1 (1.0%)                      | 1 (0.6%)                   |
| Hyperbilirubinemia                                  | 52                                 | 53                                 | 52                               | 25                        | 105                           | 157                        |
| Grade 3 or 4                                        | 0                                  | 1 (1.9%)                           | 1 (1.9%)                         | 1 (4.0%)                  | 1 (1.0%)                      | 2 (1.3%)                   |
| Grade 3                                             | 0                                  | 0                                  | 0                                | 1 (4.0%)                  | 0                             | 0                          |
| Grade 4                                             | 0                                  | 1 (1.9%)                           | 1 (1.9%)                         | 0                         | 1 (1.0%)                      | 2 (1.3%)                   |
| Creatine kinase, high                               | 52                                 | 53                                 | 52                               | 25                        | 105                           | 157                        |
| Grade 3 or 4                                        | 6 (11.5%)                          | 2 (3.8%)                           | 3 (5.8%)                         | 1 (4.0%)                  | 8 (7.6%)                      | 11 (7.0%)                  |
| Grade 3                                             | 2 (3.8%)                           | 1 (1.9%)                           | 2 (3.8%)                         | 1 (4.0%)                  | 3 (2.9%)                      | 5 (3.2%)                   |
| Grade 4                                             | 4 (7.7%)                           | 1 (1.9%)                           | 1 (1.9%)                         | 0                         | 5 (4.8%)                      | 6 (3.8%)                   |
| Creatinine, high                                    | 52                                 | 53                                 | 52                               | 25                        | 105                           | 157                        |
| Grade 3 or 4                                        | 1 (1.9%)                           | 4 (7.5%)                           | 1 (1.9%)                         | 2 (8.0%)                  | 5 (4.8%)                      | 6 (3.8%)                   |
| Grade 3                                             | 1 (1.9%)                           | 3 (5.7%)                           | 1 (1.9%)                         | 2 (8.0%)                  | 4 (3.8%)                      | 5 (3.2%)                   |
| Grade 4                                             | 0                                  | 1 (1.9%)                           | 0                                | 0                         | 1 (1.0%)                      | 1 (0.6%)                   |

|                                   |          |           |          |           |          |           |
|-----------------------------------|----------|-----------|----------|-----------|----------|-----------|
| Creatinine clearance or eGFR, low | 52       | 53        | 52       | 25        | 105      | 157       |
| Grade 3 or 4                      | 2 (3.8%) | 7 (13.2%) | 3 (5.8%) | 3 (12.0%) | 9 (8.6%) | 12 (7.6%) |
| Grade 3                           | 2 (3.8%) | 6 (11.3%) | 3 (5.8%) | 3 (12.0%) | 8 (7.6%) | 11 (7.0%) |
| Grade 4                           | 0        | 1 (1.9%)  | 0        | 0         | 1 (1.0%) | 1 (0.6%)  |
| Triglycerides (fasting)           | 48       | 51        | 49       | 23        | 99       | 148       |
| Grade 3 or 4                      | 0        | 4 (7.8%)  | 0        | 1 (4.3%)  | 4 (4.0%) | 4 (2.7%)  |
| Grade 3                           | 0        | 3 (5.9%)  | 0        | 1 (4.3%)  | 3 (3.0%) | 3 (2.0%)  |
| Grade 4                           | 0        | 1 (2.0%)  | 0        | 0         | 1 (1.0%) | 1 (0.7%)  |
| Lipase, high                      | 52       | 53        | 52       | 25        | 105      | 157       |
| Grade 3 or 4                      | 2 (3.8%) | 1 (1.9%)  | 0        | 0         | 3 (2.9%) | 3 (1.9%)  |
| Grade 3                           | 1 (1.9%) | 1 (1.9%)  | 0        | 0         | 2 (1.9%) | 2 (1.3%)  |
| Grade 4                           | 1 (1.9%) | 0         | 0        | 0         | 1 (1.0%) | 1 (0.6%)  |
| Hyperglycemia, nonfasting         | 45       | 43        | 39       | 18        | 88       | 127       |
| Grade 3 or 4                      | 2 (4.4%) | 1 (2.3%)  | 0        | 1 (5.6%)  | 3 (3.4%) | 3 (2.4%)  |
| Grade 3                           | 2 (4.4%) | 0         | 0        | 1 (5.6%)  | 2 (2.3%) | 2 (1.6%)  |
| Grade 4                           | 0        | 1 (2.3%)  | 0        | 0         | 1 (1.1%) | 1 (0.8%)  |
| Urinalysis                        |          |           |          |           |          |           |
| Glycosuria (dipstick)             | 52       | 53        | 52       | 25        | 105      | 157       |
| Grade 3 or 4                      | 2 (3.8%) | 1 (1.9%)  | 1 (1.9%) | 1 (4.0%)  | 3 (2.9%) | 4 (2.5%)  |
| Grade 3                           | 2 (3.8%) | 1 (1.9%)  | 1 (1.9%) | 1 (4.0%)  | 3 (2.9%) | 4 (2.5%)  |

BIC = bicitgravir; eGFR = estimated glomerular filtration rate; F = emtricitabine; LEN = lenacapavir; N = number of participants; SC = subcutaneous; SGOT = serum glutamic-oxaloacetic transaminase; SGPT = serum glutamic-pyruvic transaminase; TAF = tenofovir alafenamide

**Table S10. Change from Baseline in Body Weight**

|                                         | <b>Subcutaneous LEN<br/>+F/TAF→TAF<br/>(n=52)</b> | <b>Subcutaneous LEN<br/>+F/TAF→BIC<br/>(n=53)</b> | <b>Oral LEN<br/>+F/TAF<br/>(n=52)</b> | <b>BIC/F/TAF<br/>(n=25)</b> |
|-----------------------------------------|---------------------------------------------------|---------------------------------------------------|---------------------------------------|-----------------------------|
| Change from baseline in body weight, kg |                                                   |                                                   |                                       |                             |
| Week 28, median (Q1, Q3)                | 1.7 (-0.7, 4.7)                                   | 1.8 (-0.7, 4.6)                                   | 3.2 (0.5, 5.0)                        | 2.7 (0.0, 4.8)              |
| Week 54, median (Q1, Q3)                | 3.6 (-0.3, 6.8)                                   | 2.5 (-0.4, 6.3)                                   | 2.2 (0.9, 7.2)                        | 2.3 (-3.1, 7.3)             |

BIC, bicitgravir; F, emtricitabine; LEN, lenacapavir; TAF, tenofovir alafenamide

**Figure S1. Antiviral Activity Snapshot Outcome (ITT) at Week 28.** BIC, bicitegravir; F, emtricitabine; LEN, lenacapavir; QD, daily; SC, subcutaneous; TAF, tenofovir alafenamide TG, treatment group. \*1 participant discontinued due to not meeting the protocol criteria of having HIV-1 RNA <50 copies/mL prior to week 28; 1 participant discontinued on day 2.

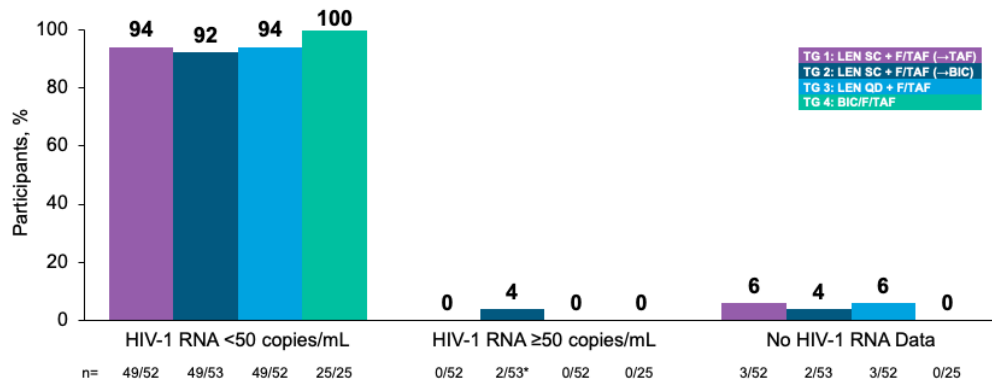

1
